# Supplementary material for: EIF3C Promotes Lung Cancer Tumorigenesis by Regulating the APP/HSPA1A/LMNB1 Axis
Source: Hindawi journal article supplement (doi:10.1155/2022/9464094), 2022-09-14

**Figure S1** The expression of EIF3C as comparison to transfected with NC detected by RT-qPCR. \*\*\*p < 0.001 compared with control.

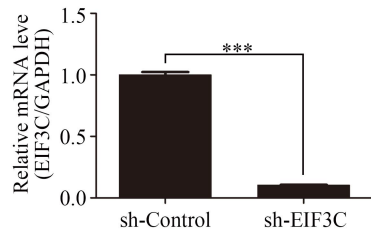

**Figure S2** Signal transmission of molecules in ERK5 Signaling affected by DEGs

Red, up-regulated; green, down-regulated.

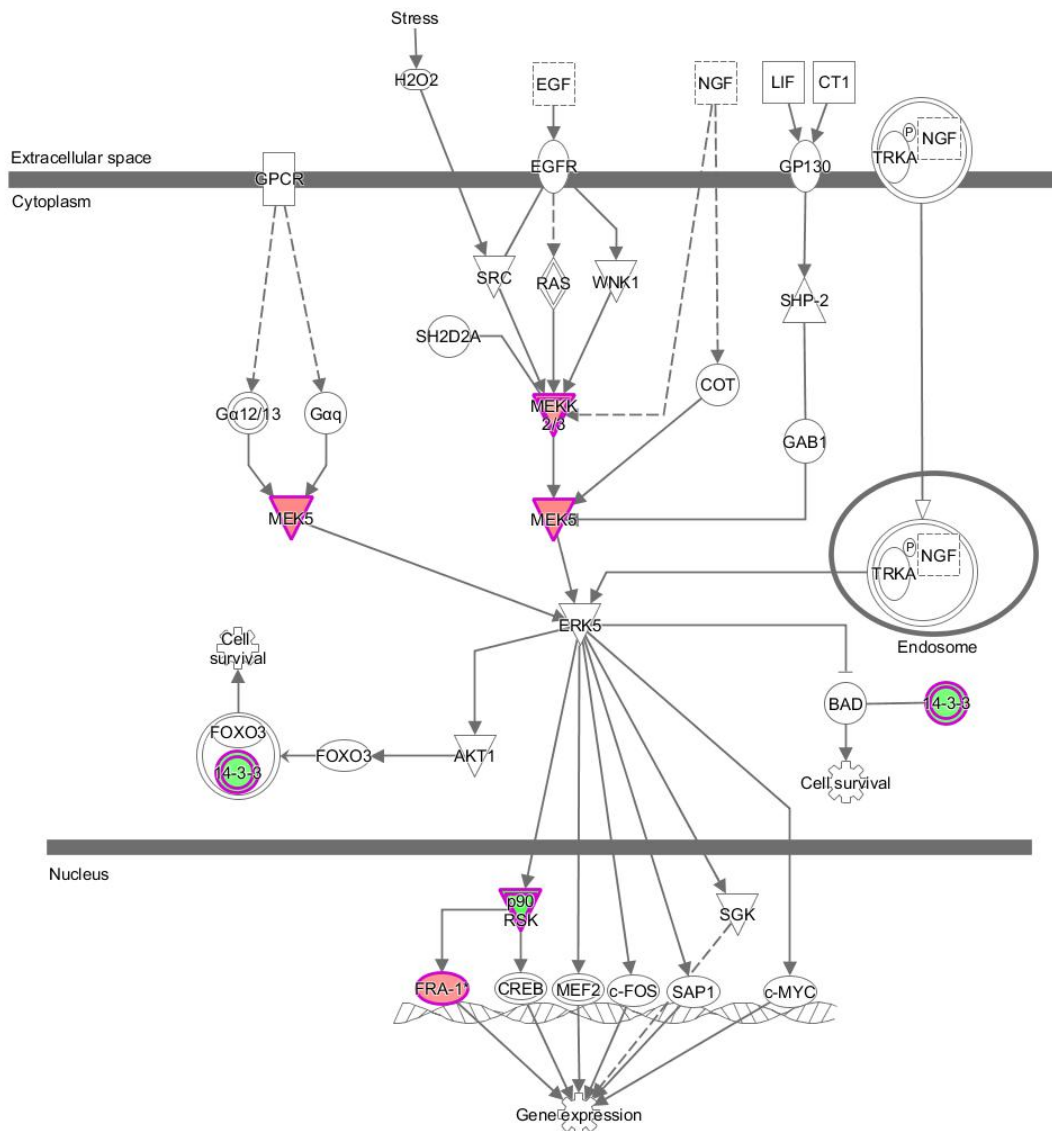

**Figure S3 Signal transmission of molecules in ERK5 Signaling supported by published literatures**

Red, up-regulated; green, down-regulated.

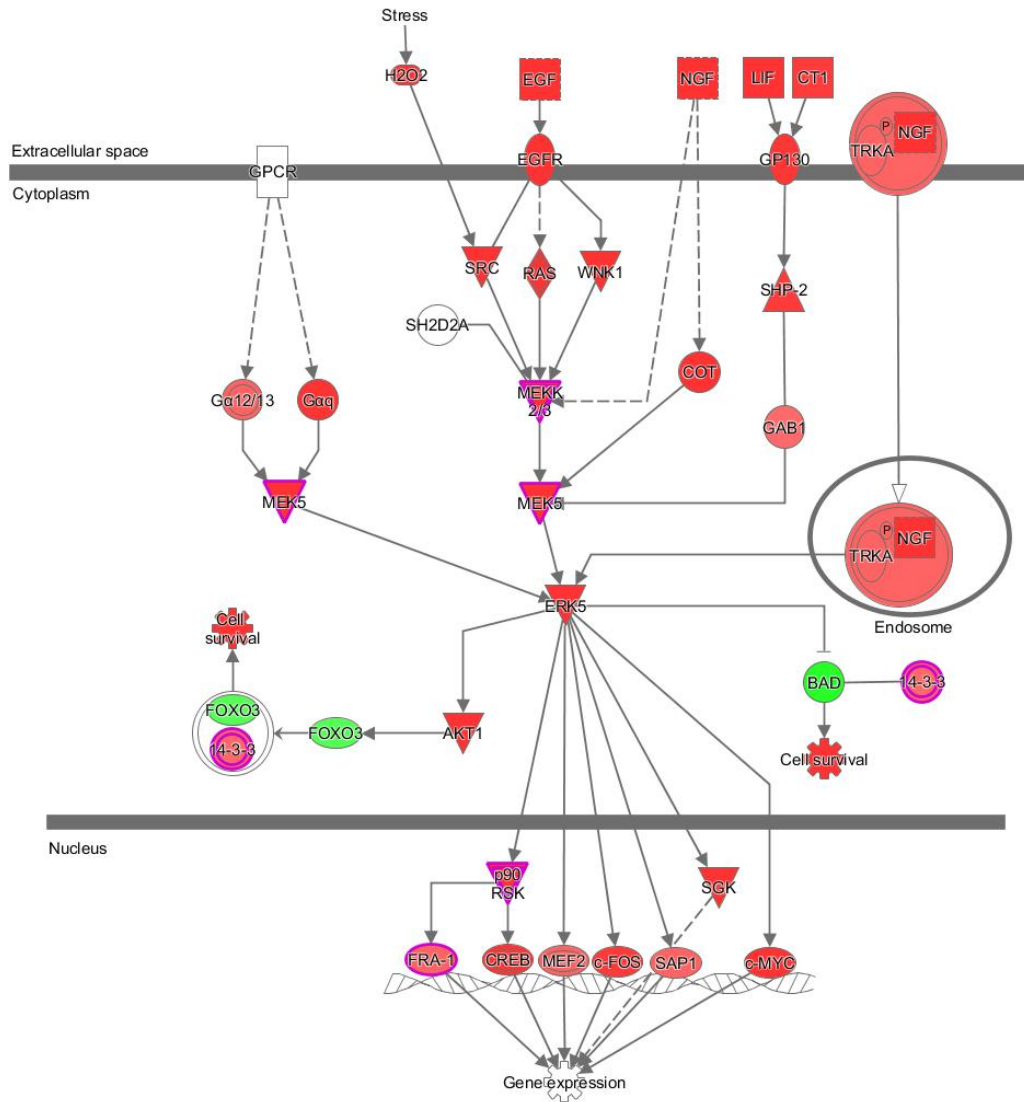

Supplement: f1 [file 9464094.f1.pdf]
